# Supplementary material for: Inadequate fine-tuning of protein synthesis and failure of amino acid homeostasis following inhibition of the ATPase VCP/p97
Source: PubMed Central journal article supplement (PMC4720905; doi:10.1038/cddis.2015.373), 2015-12-31
Supplement: cddis2015373x1.pdf [file cddis2015373x1.pdf]

## Supplementary Figure S1.

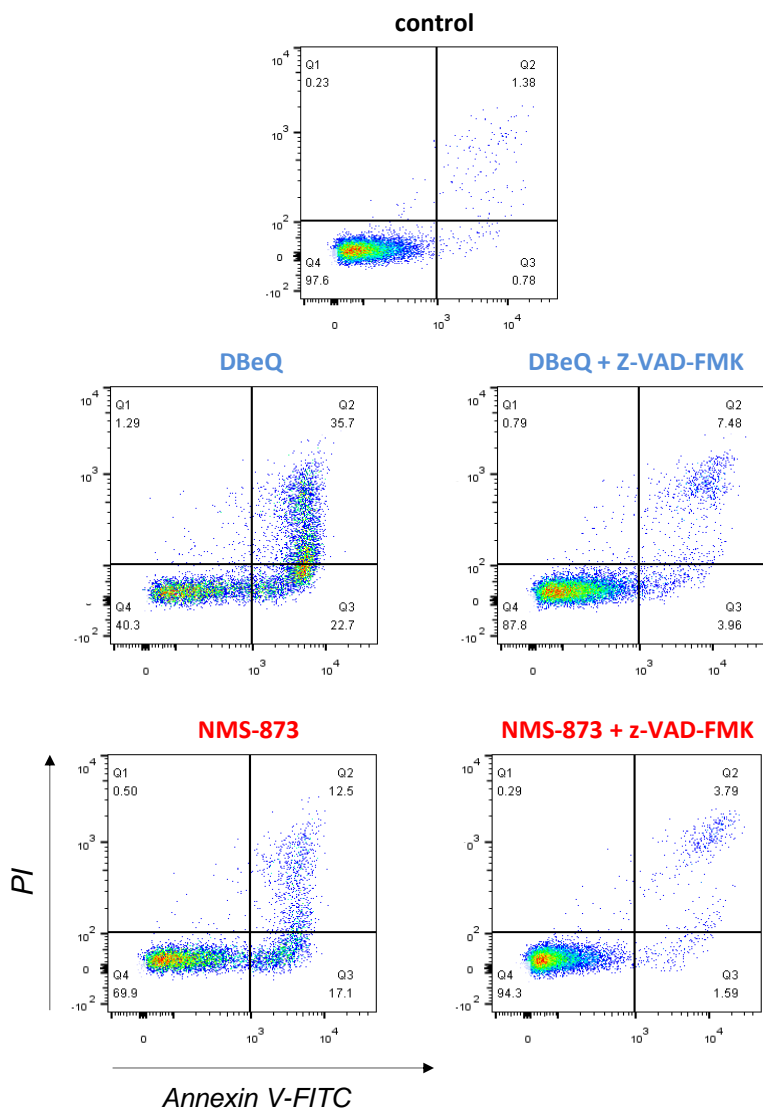

**Supplementary Figure S1. Cell death induced by VCP inhibition is largely caspase-dependent.** Cell death of A549 cells was determined by FACS analysis of cells stained with Annexin V-FITC and propidium iodide (PI) after treatment with DBEq (17.5 $\mu$ M) or NMS-873 (15 $\mu$ M), with or without the pan-caspase inhibitor z-VAD-FMK (50 $\mu$ M), for 24h.

## Supplementary Figure S2.

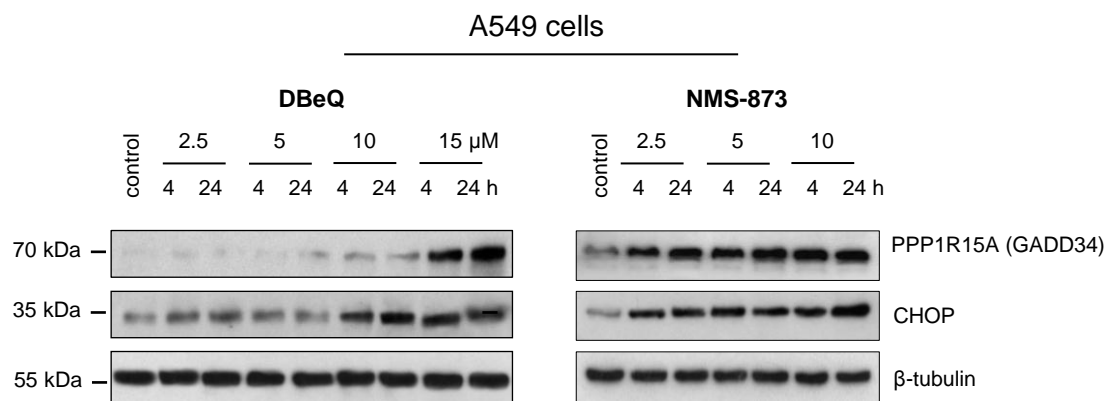

**Supplementary Figure S2. VCP inhibition induces PPP1R15A (GADD34) and CHOP protein levels.** Representative immunoblots on whole cell extracts from A549 cells are shown.

## Supplementary Figure S3.

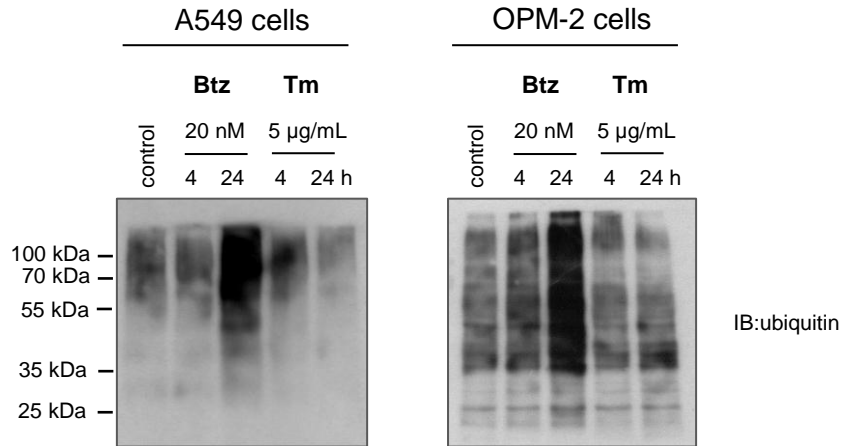

**Supplementary Figure S3. Bortezomib disrupts the UPS in A549 cells.** Representative immunoblots with antibodies against ubiquitin on whole cells extracts from A549 and OPM2 cells treated with bortezomib (Btz) or tunicamycin (Tm).

## Supplementary Figure S4.

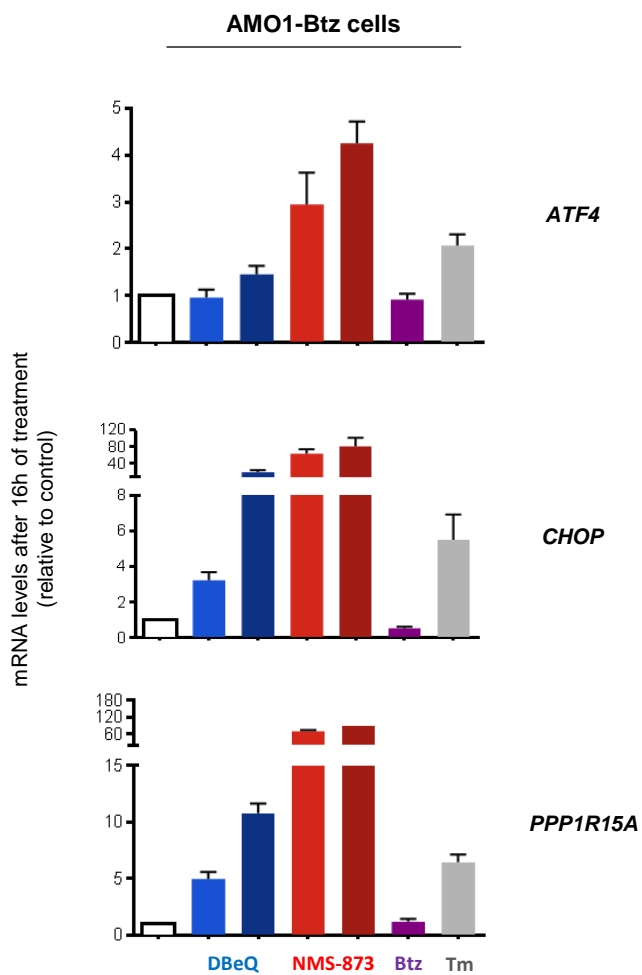

**Supplementary Figure S4. VCP inhibition induces ATF4, CHOP, and PPP1R15A in bortezomib-adapted myeloma cells.** mRNA levels of the indicated genes relative to untreated controls (white bars) determined by real-time quantitative PCR. Bortezomib-adapted AMO1-Btz cells were treated with DBeQ (10 and 15 μM), NMS-873 (10 and 15 μM), bortezomib (Btz, 20 nM) or tunicamycin (Tm, 5 μg/mL) for 16 h. Data shown are the mean ± SEM from 3 independent experiments.

## Supplementary Figure S5.

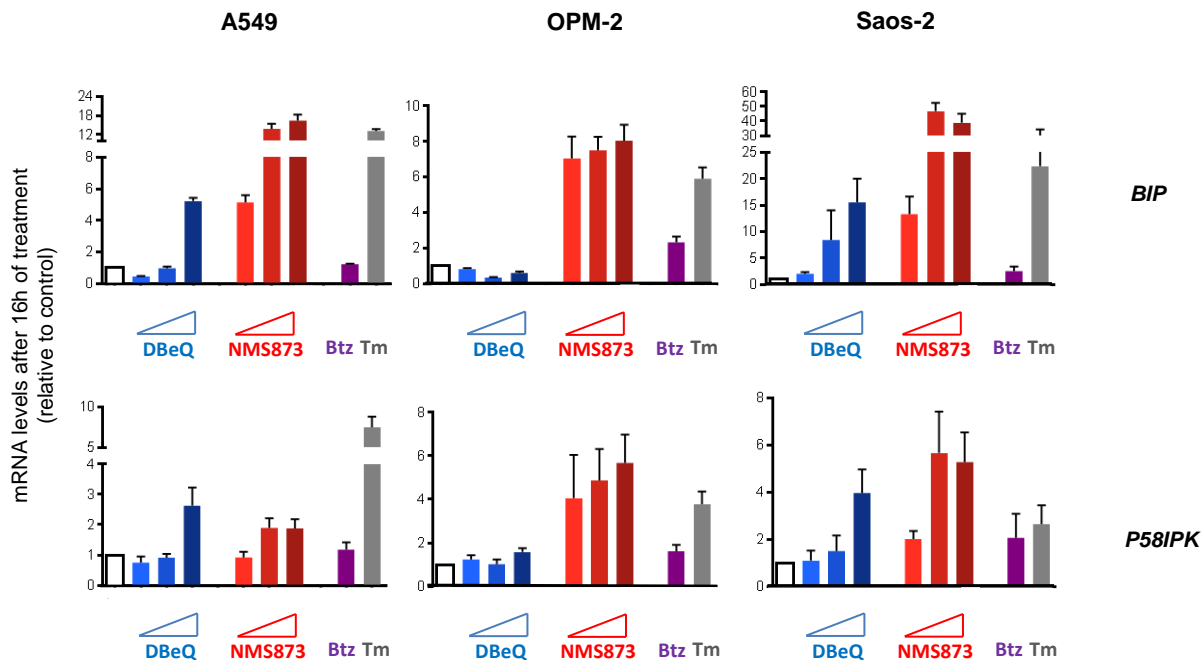

**Supplementary Figure S5. VCP inhibitors induce ER chaperones.** Relative mRNA levels of the indicated genes compared to untreated controls (white bars) determined by real-time quantitative PCR. The indicated cell lines were treated with DBeQ (5, 10, and 15 $\mu$ M), NMS-873 (5, 10, and 15 $\mu$ M), bortezomib (Btz, 20nM) or tunicamycin (Tm, 5 $\mu$ g/mL) for 16 h. Data shown are the mean  $\pm$  SEM from 3 independent experiments.

# Supplementary Figure S6.

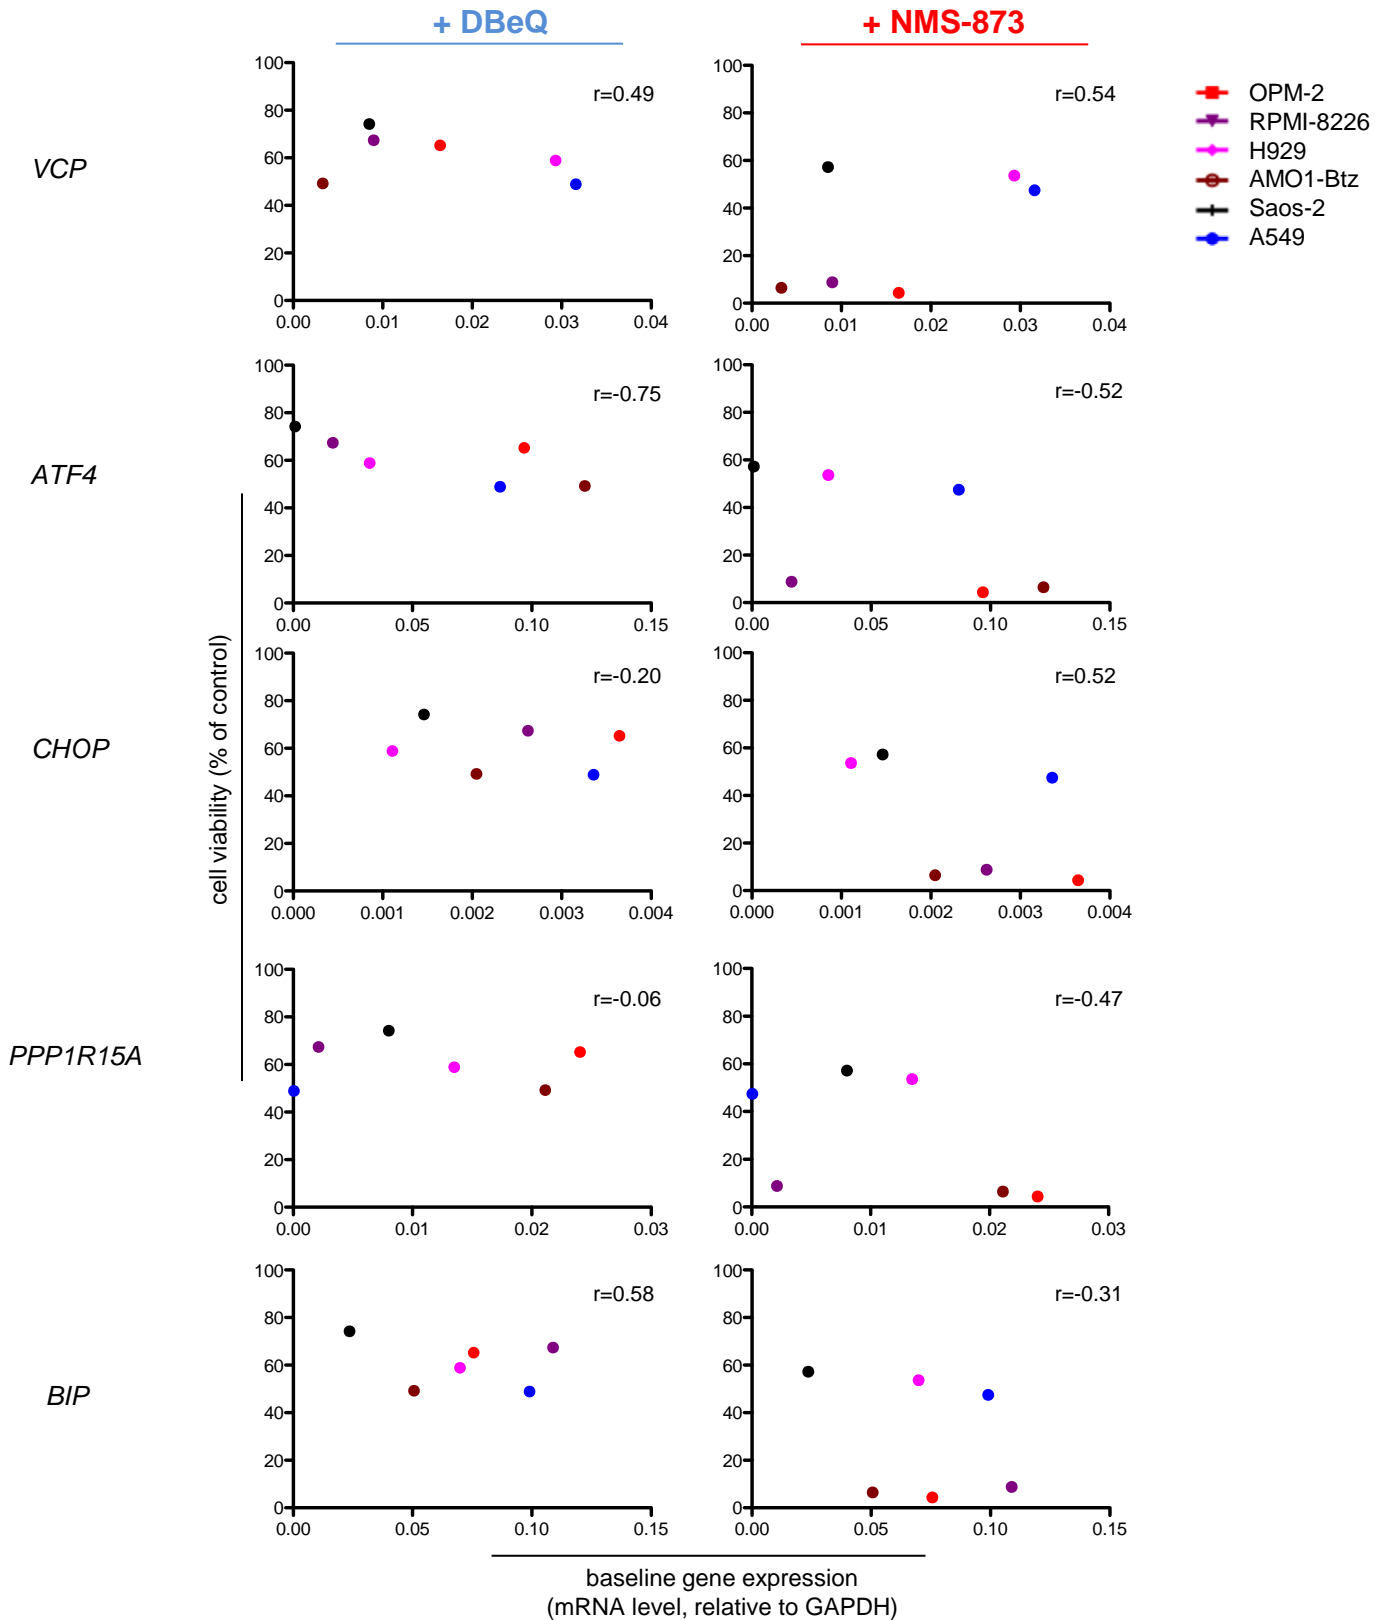

**Supplementary Figure S6. VCP inhibitor-induced cell death does not correlate with the baseline expression of VCP or key proteotoxic stress response genes in cancer cell lines.** Graphs show baseline mRNA levels of the indicated genes and correlation with cell death following treatment with DbeQ (10 $\mu$ M) or NMS-873 (10 $\mu$ M) for 24h. No r-value was statistically significant.

## Supplementary Figure S7.

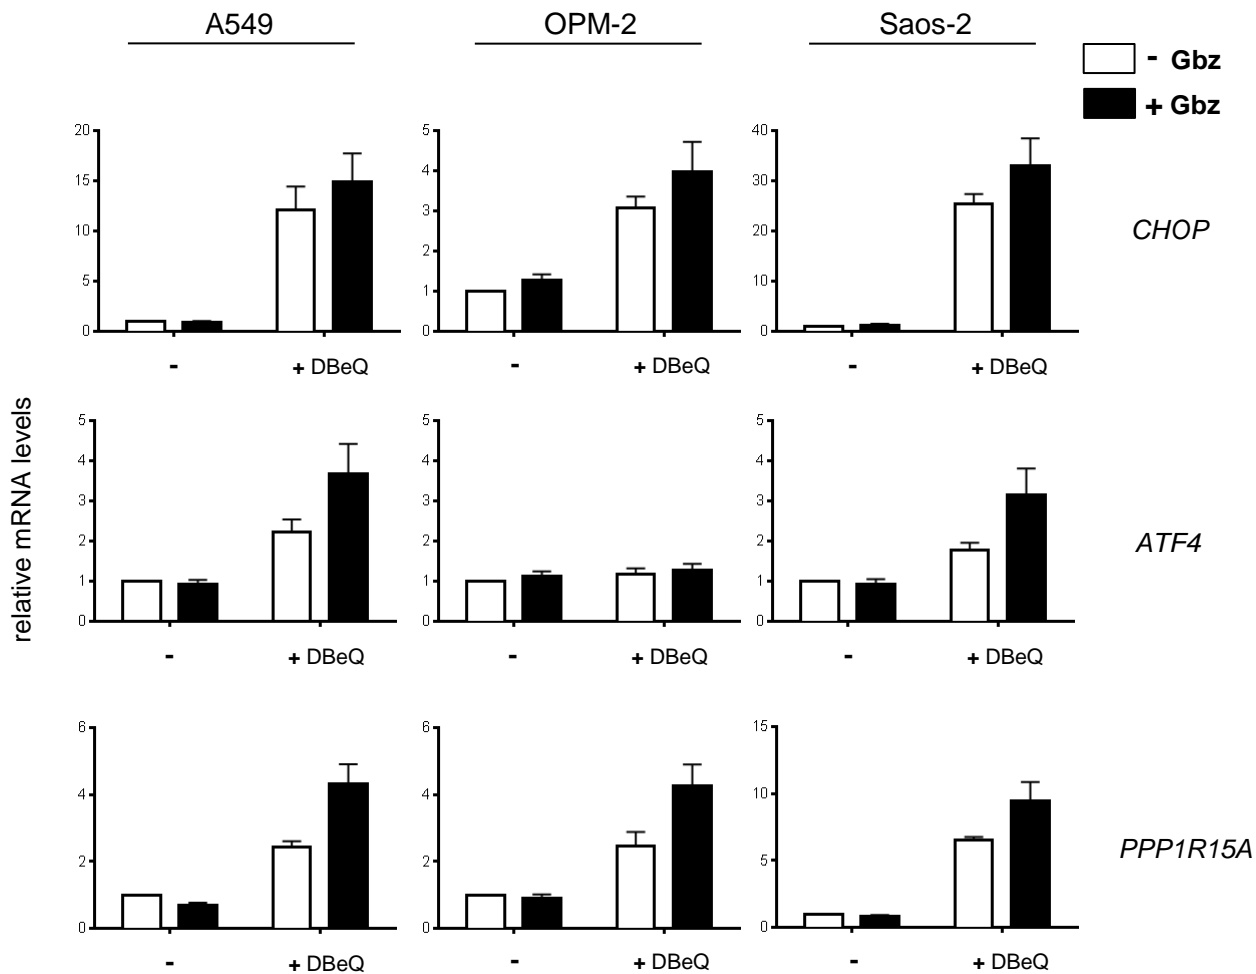

**Supplementary Figure S7. Guanabenz impacts on mRNA levels of genes downstream of eIF2 $\alpha$ .** mRNA levels of the indicated genes relative to untreated controls determined by real-time quantitative PCR. A549, OPM-2, and Saos-2 cells were treated with DBeQ (15 $\mu$ M) in the presence of guanabenz (Gbz, 2.5 $\mu$ M) for 6h before mRNA isolation. Data shown are the mean  $\pm$  SEM from 3 independent experiments.

## Supplementary Figure S8.

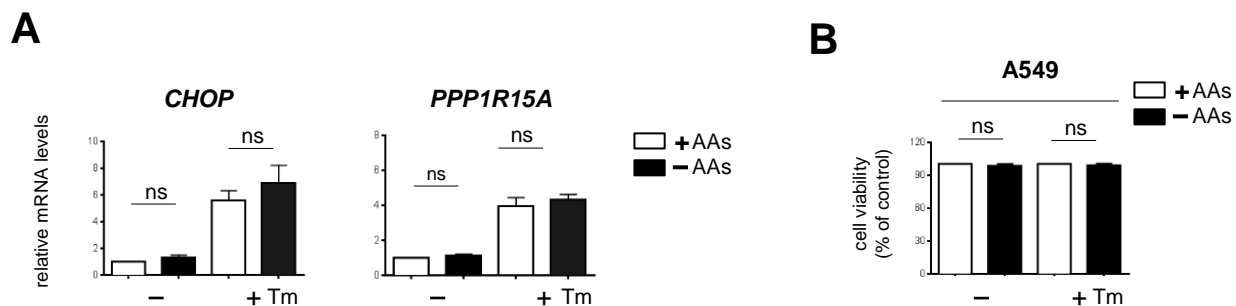

**Supplementary Figure S8. Intracellular amino acid depletion has no effect on viability of A549 cells or induction of CHOP and PPP1R15A mRNAs after treatment with the glycosylation inhibitor tunicamycin. (A)** Relative mRNA levels of the indicated genes in A549 cells grown in complete DMEM (+AA) or DMEM deficient in L-glutamine, L-methionine and L-cystine (-AA), and treated with tunicamycin (Tm, 5 $\mu$ g/mL) for 16h. **(B)** Viability of cells treated as in (A). Data shown are the mean  $\pm$  SEM from 3 independent experiments; ns, not statistically significant.
